# Supplementary material
Source: Springer Nature journal article supplement (https://www.springerprofessional.de/resource/supplementary/13638_2011_303_MOESM3_ESM.pdf/11898162)
Supplement: MOESM3 [file 11898162]

$$\begin{array}{c}
 \text{c1} \\
 \text{c2} \\
 \text{c3} \\
 \text{c4}
 \end{array}
 \begin{pmatrix}
 \text{v1} & \text{v2} & \text{v3} & \text{v4} & \text{v5} & \text{v6} \\
 1 & 0 & 1 & 0 & 0 & 1 \\
 0 & 1 & 0 & 0 & 1 & 1 \\
 0 & 0 & 1 & 1 & 1 & 0 \\
 1 & 1 & 0 & 1 & 0 & 0
 \end{pmatrix}$$

 the position of split row

(a) H matrix

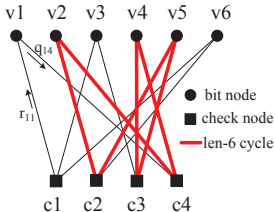

(b) Tanner Graph
